# Supplementary material
Source: PubMed Central journal article supplement (PMC3201724)
Supplement: NIHMS321870-supplement-supplement_1.pdf [file NIHMS321870-supplement-supplement_1.pdf]

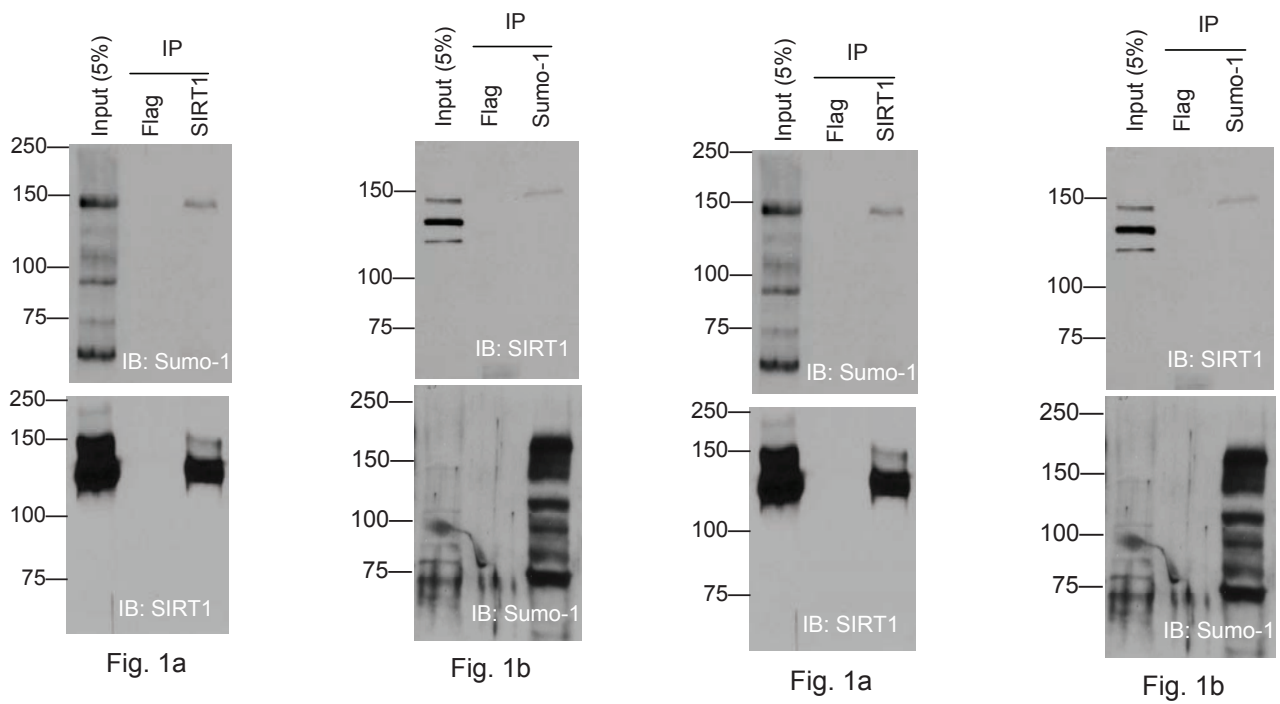

**Figure S1** The uncropped images of all gel data presented in the paper are shown with molecular weight markers.

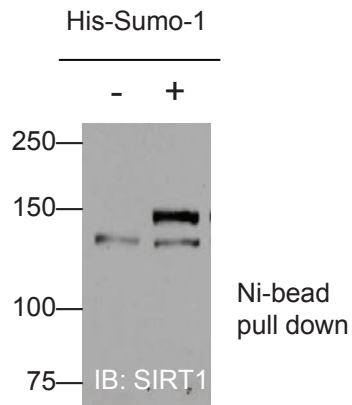

Fig. 1c

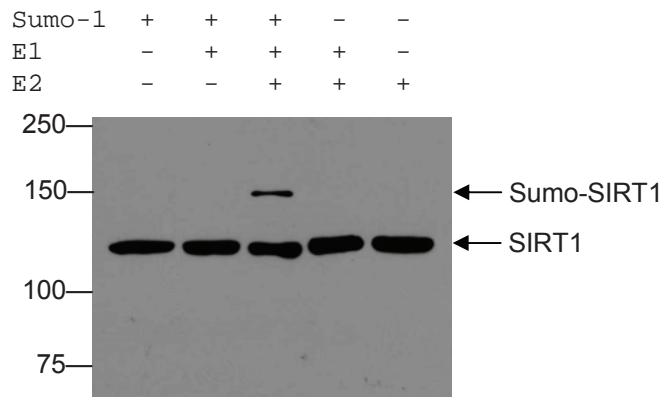

Fig. 1d

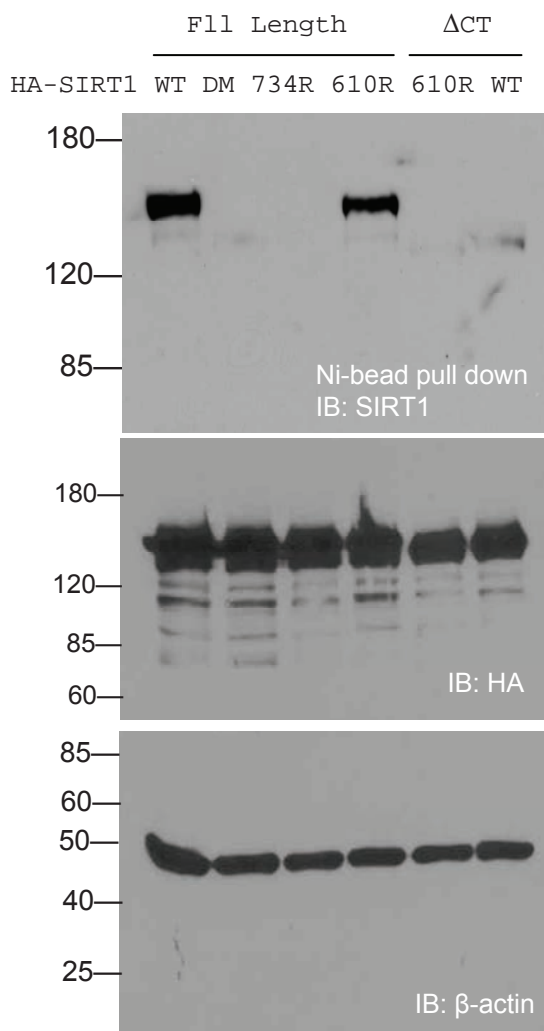

Fig. 2b

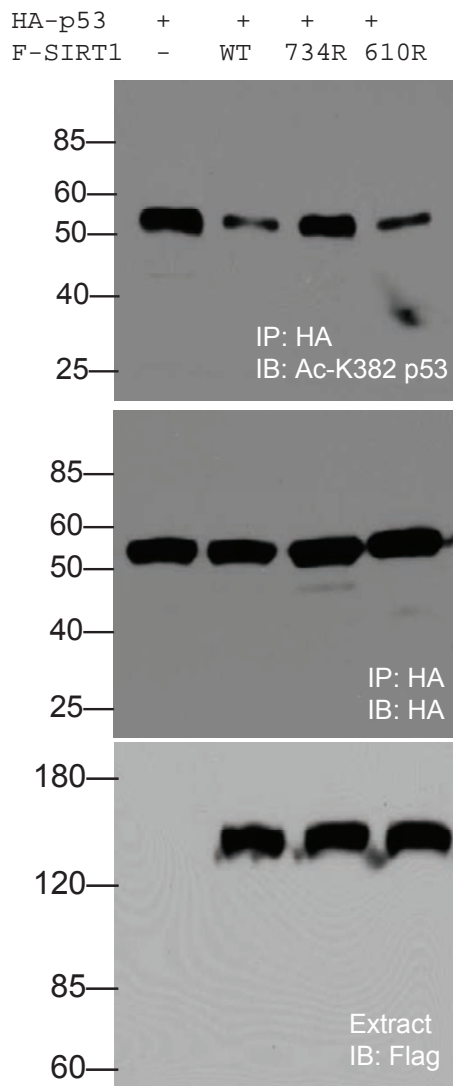

Fig. 2d

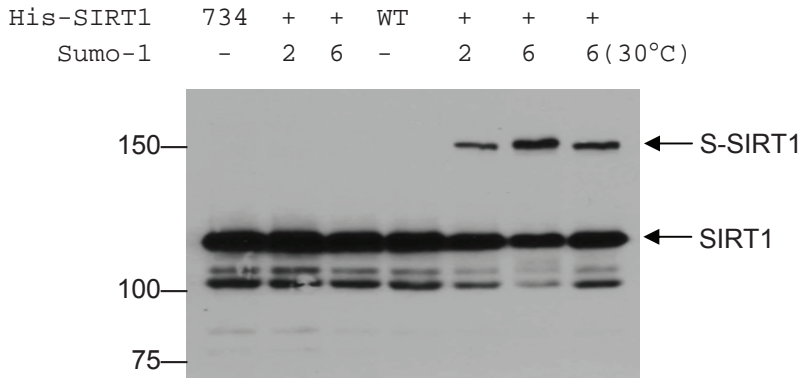

Fig. 3a

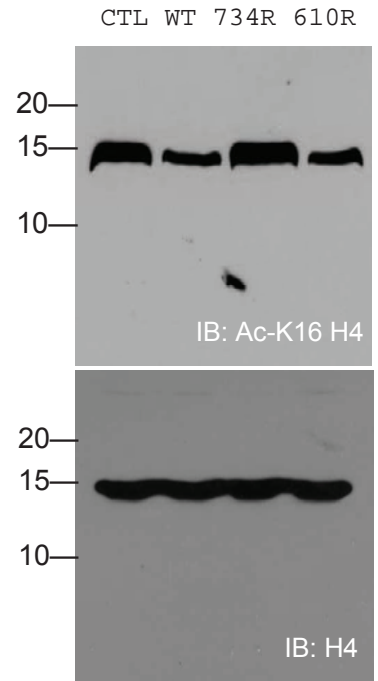

Fig. 3c

|             |   |   |   |   |
|-------------|---|---|---|---|
| mSIRT1 (WT) | + | + | - | - |
| mSIRT1 (VK) | - | - | + | + |
| His-Sumo1   | - | + | - | + |

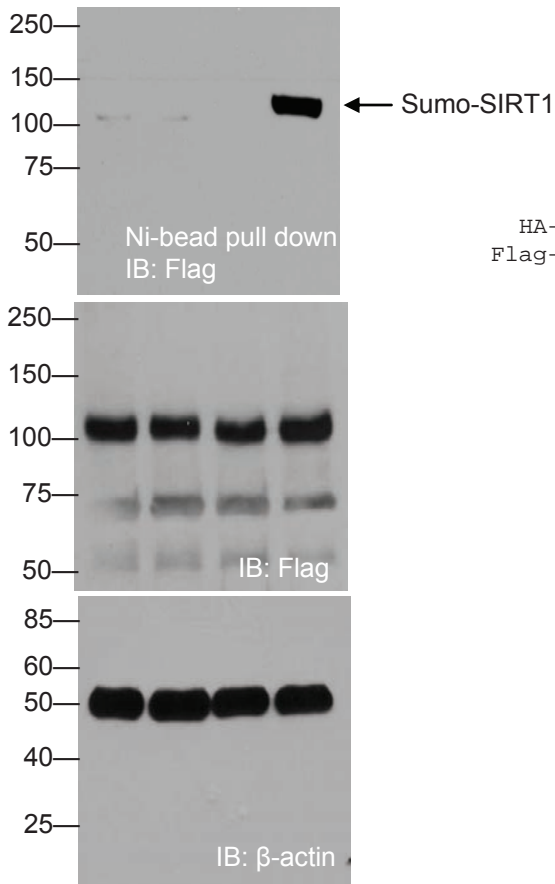

Fig. 3e

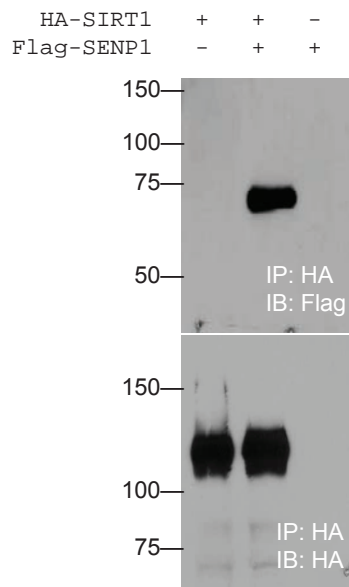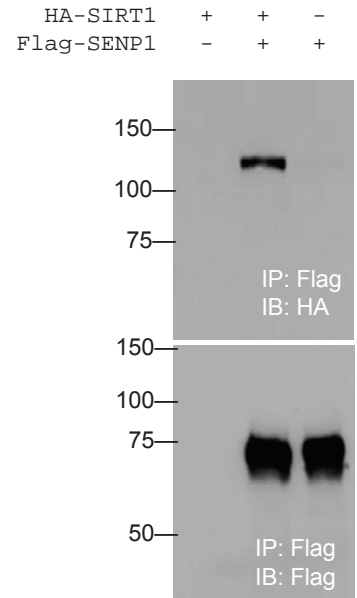

Fig. 4a

SUPPLEMENTARY INFORMATION

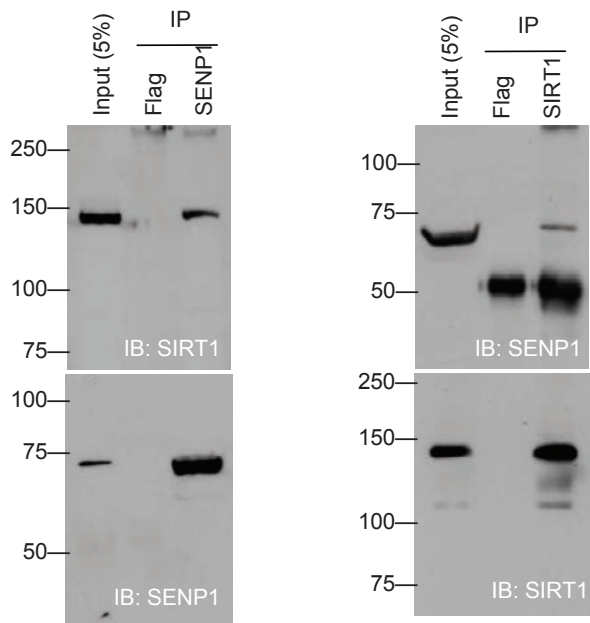

Fig. 4b (left)

Fig. 4b (right)

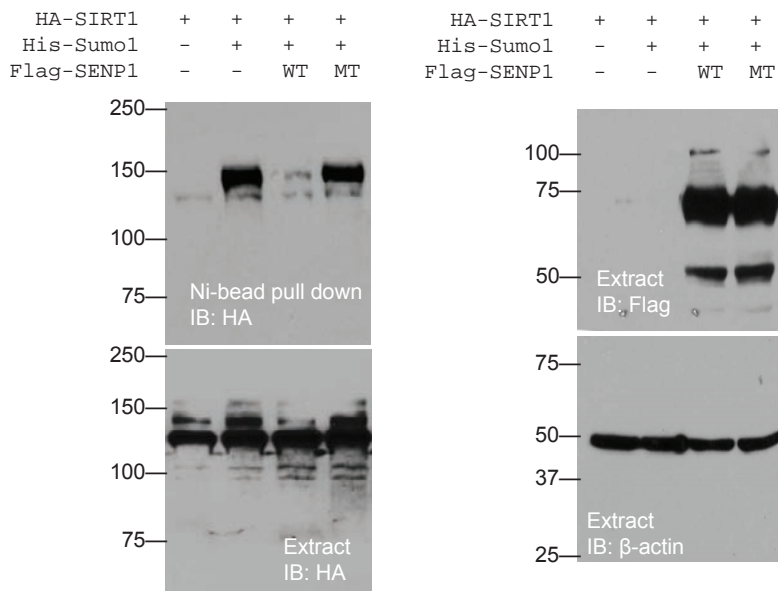

Fig. 4d

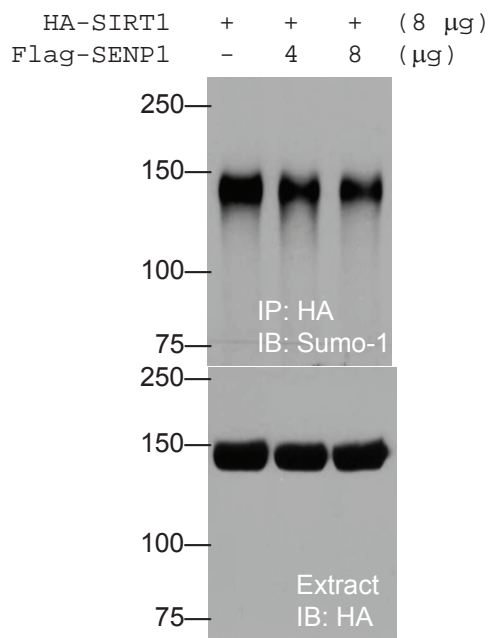

Fig. 4e

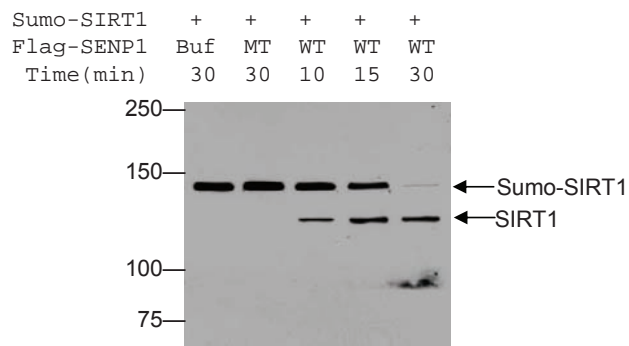

Fig. 4g

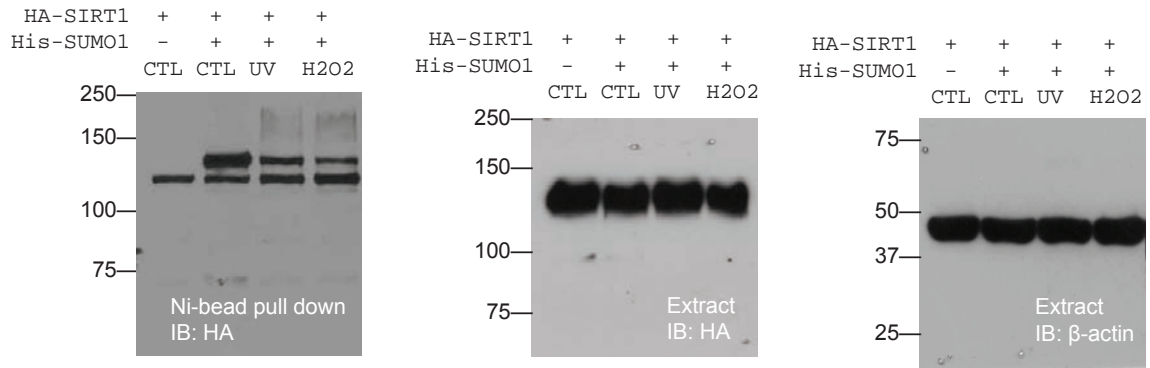

Fig. 5a

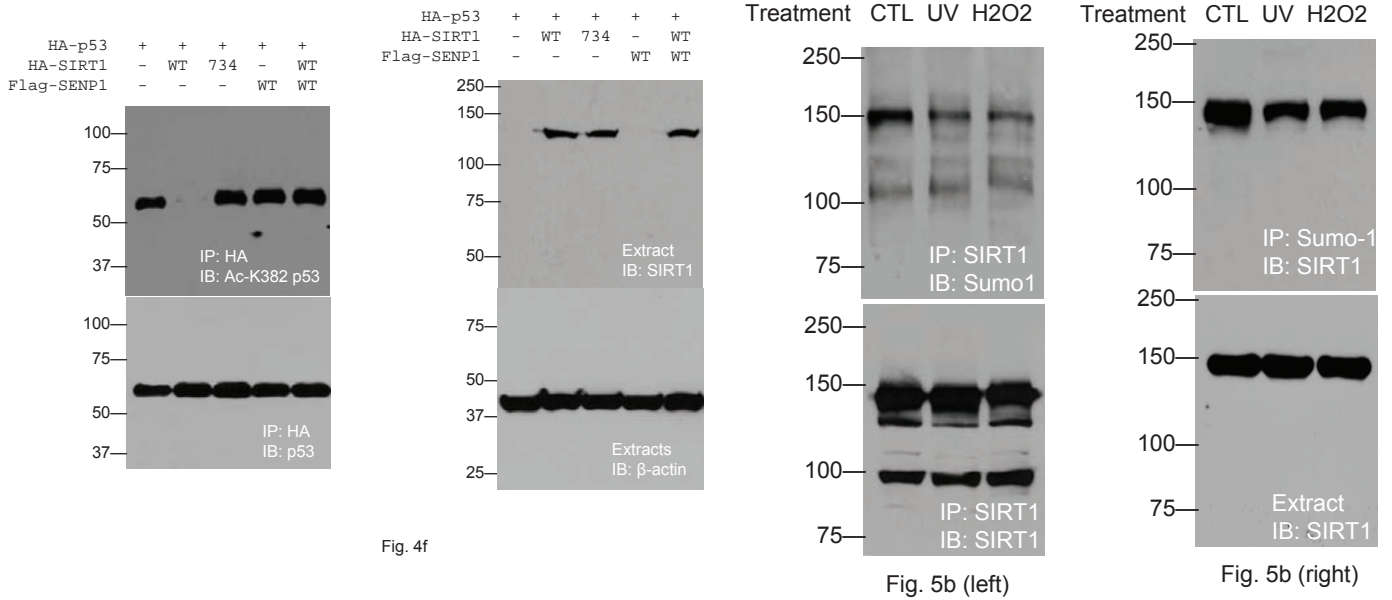

Fig. 4f

Fig. 5b (left)

Fig. 5b (right)

# SUPPLEMENTARY INFORMATION

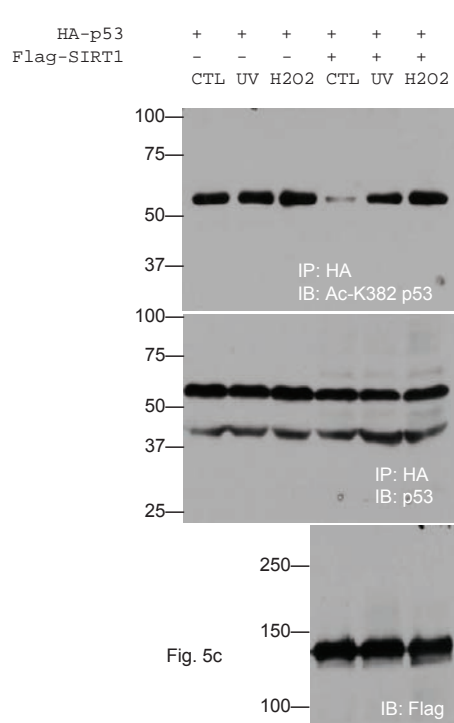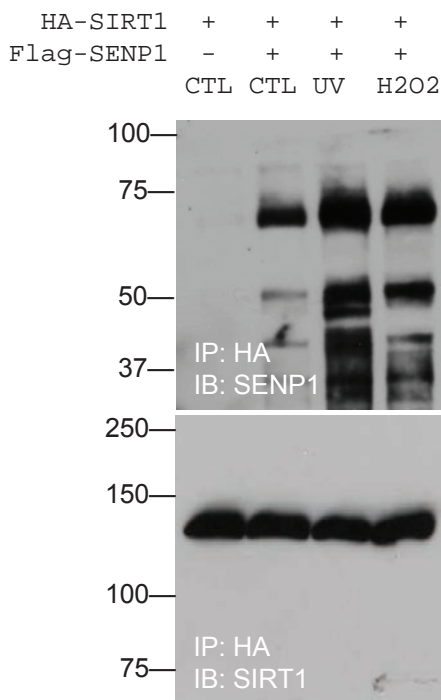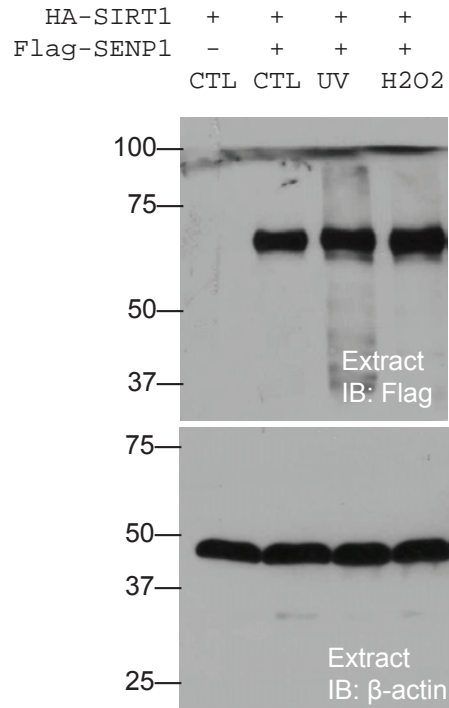

Fig. 6a

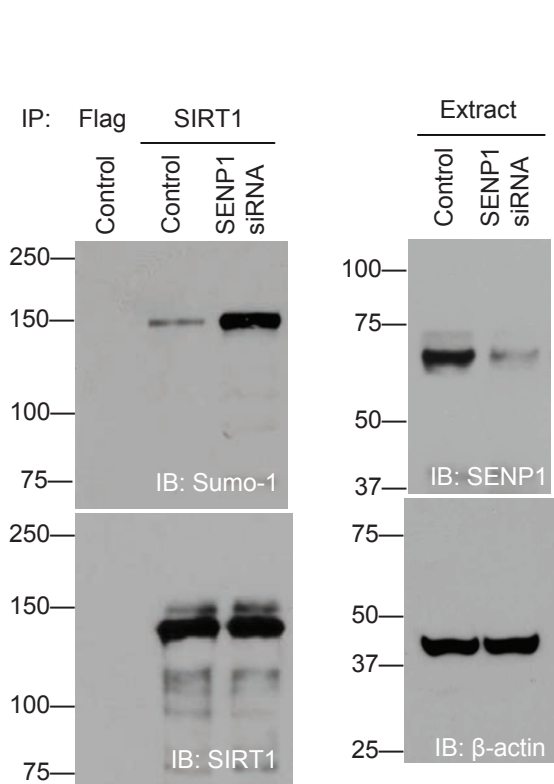

Fig. 6b

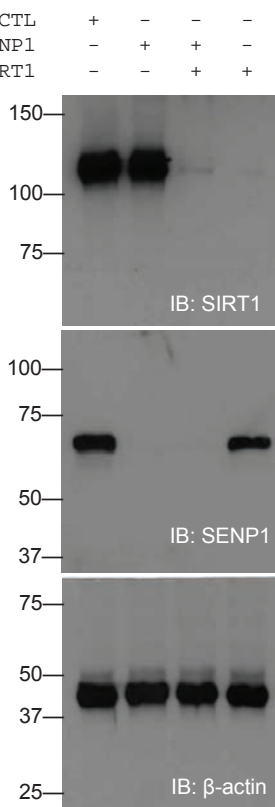

Fig. 6c

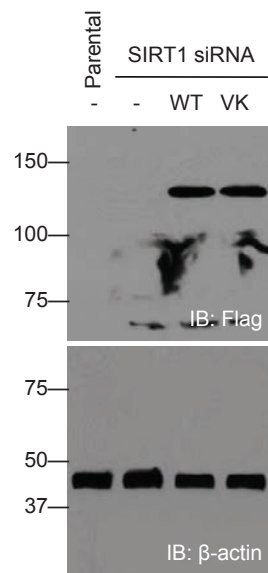

Fig. 6d

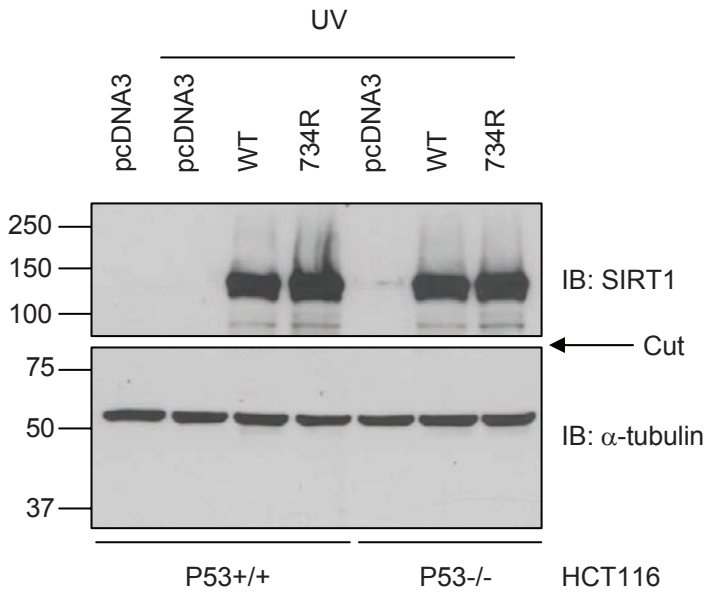

Fig. 7a

The full blot was cut. The top half was used for immunoblotting for SIRT1 and the bottom for  $\alpha$ -tubulin.

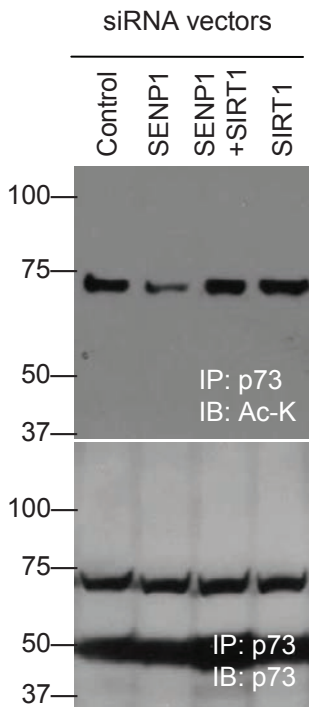

Fig. 7b

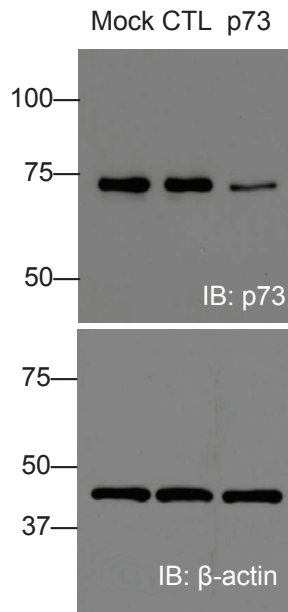

Fig. 7c
